# Supplementary material
Source: Research Square preprint supplement (doi:10.21203/rs.3.rs-10062394/v1)
Supplement: Supplementary file 1 [file 09064ca6d0eb02983a6af159.docx]

**Supplementary information (SI)**

**CRISPR/Cas12a-based method to discriminate *Plasmodium ovale wallikeri* and *Plasmodium ovale curtisi.***

Shucheng Ruan1,2#, Xiaofei Zhao1#, Songcheng Yu2, Penghui Ji1, Suhua Li1, Hongwei Zhang1, Yan Deng1, Dongyang Zhao1, Ruimin Zhou 1*

1Henan Province Center for Disease Control and Prevention; Henan medical Key Laboratory of Parasite Pathogen and Vector; Henan Key Laboratory of Infectious Pathogenic Microbiology**;**Zhengzhou, 450016, China

2 College of Public Health, Zhengzhou University, Zhengzhou, 450001, China

# Shucheng Ruan and Xiaofei Zhao contributed equally to this work

*Corresponding author: Ruimin Zhou

Address: 105 Nongyenan Road, Zhengzhou City, P. R. China

Tel: 13938226397

E-mail: zrm920@126.com

**Table S1.** The usage of DNA and RNA probe sequences in this study.

| **Name** | **Sequence (From 5’ to 3’)** |
| --- | --- |
| *Pow* | AACTATGCCGACTAGGTTTTGGATGAAAAGTTTTTAAATAAGAAAATTCCTTTTGGAAATTTCTTAGATTGCTTCCTTCAGT |
| *Poc* | AACTATGCCGACTAGGTTTTGGATGAAAGATTTTTAAATAAGAAAATTCCTTTCGGGGAAATTTCTTAGATTGCTTCCTTCAGT |
| Forward primer | AACTATGCCGACTAGGTT |
| Reverse primer | ACTGAAGGAAGCAATCTAAG |
| crRNA1 | UAAUUUCUACUAAGUGUAGAUAAGAAAAUUCCUUUUGGAAA |
| crRNA 2 | UAAUUUCUACUAAGUGUAGAUUUCCAAAAGGAAUUUUCUUA |
| crRNA 3 | UAAUUUCUACUAAGUGUAGAUCAAAAGGAAUUUUCUUAUUU |
| crRNA 4 | UAAUUUCUACUAAGUGUAGAUUUCCCCGAAAGGAAUUUUCU |
| crRNA 5 | UAAUUUCUACUAAGUGUAGAUAGAAAUUUCCCCGAAAGGA |
| Reporter | 6-FAM-TTTTTT-BHQ-1 |

**The feasible of PCR amplification**


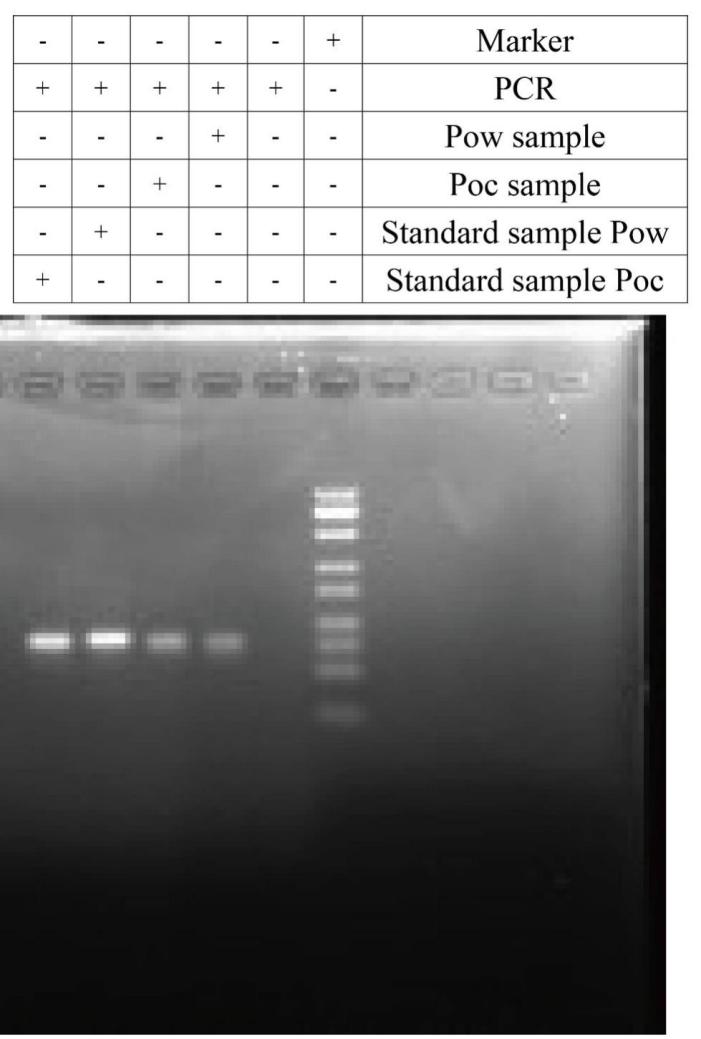


**Fig. S1** Gel electrophoresis analysis of PCR product. Lane 1: Marker, Lane 2: Negative control, Lane 3: Sample *Pow*, Lane 4: Sample *Poc*, Lane 5: Standard sample *Pow*, Lane 6: Standard sample *Poc*.

**Real sample tests**


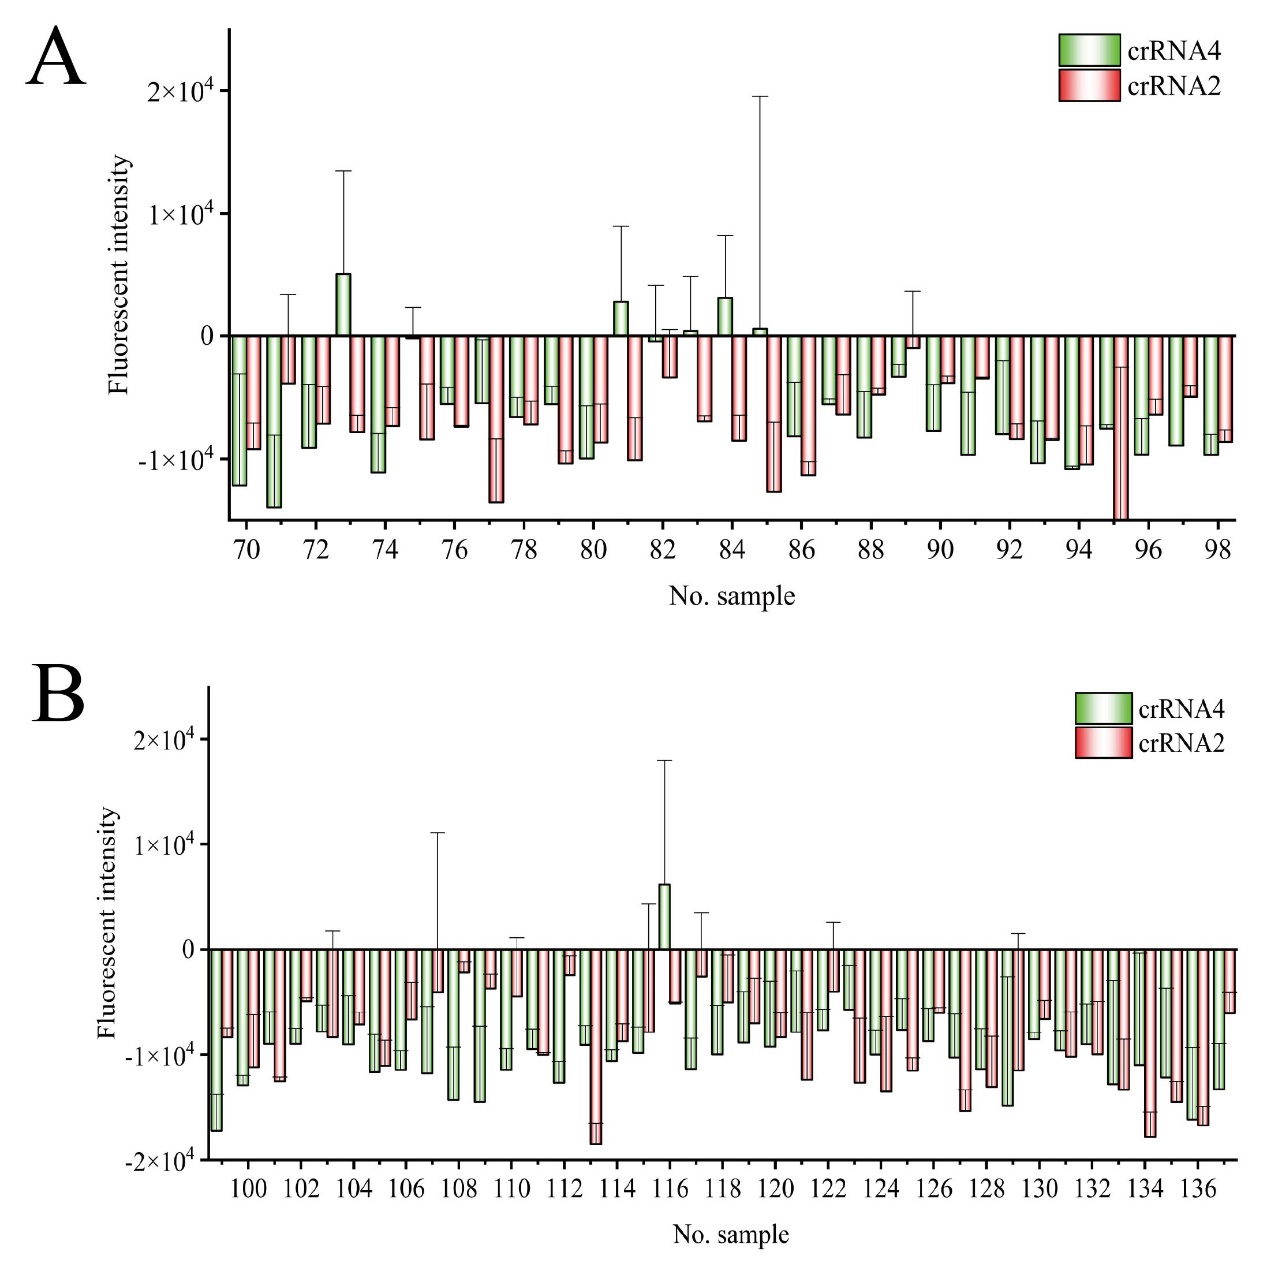


**Fig. S2** CRISPR/Cas12a detection for other non-target malaria species. (A) The fluorescence result of *P.m* and *P.v*. (B) The fluorescence result of *P.f*.

**Table S2.** Comparison of different methods for discriminating *Pow* and *Poc* detection

| **Ref.** | **Target** | **Method** | **Equipment dependency** | **How to identify** | ***Poc*** | ***Pow*** | **Detection performance** |
| --- | --- | --- | --- | --- | --- | --- | --- |
| (1) | 18S rRNA | Real-time qPCR | High | Not mentioned | 20 | 11 | 50 plasmid copies/uL (*Pow*) |
| (2) | 18S rRNA | Real-time qPCR | High | Differentiated with a small ΔTm | 14 | 19 | 88% specificity for *P.ovale spp.* |
| (3) | *PoTRA* | Nested PCR | low | Band size | 7 | 10 | 2 to 10 parasites/μL blood. |
| This study | 18S rRNA | CRISPR/Cas12a | low | Fluorescence intensity | 31 | 37 | 100 copy/μL for *Pow*, 30 copy/μL for *Poc* |

**Reference**

1. Calderaro A, Piccolo G, Gorrini C, Montecchini S, Rossi S, Medici M C, et al. A New Real-Time PCR for the Detection of Plasmodium ovale wallikeri[J]. PLOS ONE, 2012, 7(10): e48033.

2. Lamien-Meda A, Fuehrer H-P, Noedl H. Novel high resolution melting (HRM) and snapback assays for simultaneous detection and differentiation of Plasmodium ovale spp[J]. Acta Tropica, 2019, 192: 75-81.

3. Tanomsing N, Imwong M, Sutherland Colin J, Dolecek C, Hien Tran T, Nosten F, et al. Genetic Marker Suitable for Identification and Genotyping of Plasmodium ovale curtisi and Plasmodium ovale wallikeri[J]. Journal of Clinical Microbiology, 2013, 51(12): 4213-4216.
